# Supplementary material for: Lessons from Fraxinus, a crowd-sourced citizen science game in genomics
Source: eLife journal article supplement (doi:10.7554/elife.07460), 2015-07-28
Supplement: supp1 [file elife-07460-supp1-v1.pdf]

## Supplemental File 1.

### Rallapalli et al., Fraxinus: a citizen science game where players improve software DNA alignments & a model for strategising in crowdsourcing

**Table S1.** Details of alignment answers received for the Fraxinus version 1

| Category                                                         | all    | SNP    | INDEL |
|------------------------------------------------------------------|--------|--------|-------|
| Total no. of puzzles                                             | 10087  | 9022   | 1065  |
| Total no. of alignments                                          | 154038 | 138759 | 15279 |
| Total no. of empty alignments                                    | 35921  | 33214  | 2707  |
| Selected puzzles for analysis                                    | 7620   | 6798   | 822   |
| No. of alignments for selected puzzles                           | 117471 | 105647 | 11824 |
| Puzzles - all high score players aligned differently to software | 4701   | 3997   | 704   |
| Puzzles - few high score players aligned differently to software | 154    | 99     | 55    |
| Puzzles - no high score players aligned differently to software  | 2765   | 2702   | 63    |

**Table S2.** Comparison of the alignments that were aligned differently to software by players

| Type     | Aligner    | Puzzles |       |       |
|----------|------------|---------|-------|-------|
|          |            | all     | SNP   | INDEL |
| Identity | Player     | 15.26   | 12.32 | 28.75 |
|          | Both Equal | 78.37   | 80.77 | 67.36 |
|          | Software   | 6.37    | 6.91  | 3.89  |
| Score    | Player     | 18.09   | 14.97 | 32.40 |
|          | Both Equal | 78.19   | 80.95 | 65.51 |
|          | Software   | 3.73    | 4.08  | 2.09  |

**Table S3.** Details of news articles, press releases and social network mentions promoting Fraxinus game

| Type           | Description                            | url                                                                                                                                                                                                               | Date       |
|----------------|----------------------------------------|-------------------------------------------------------------------------------------------------------------------------------------------------------------------------------------------------------------------|------------|
| News articles  | BBC & UK newspapers                    | <a href="http://www.bbc.co.uk/news/science-environment-23635094">http://www.bbc.co.uk/news/science-environment-23635094</a>                                                                                       | 13/08/2013 |
|                | The Scientist                          | <a href="http://www.the-scientist.com/?articles.view/articleNo/37121/title/Gamers-to-Fight-Tree-Ailment/">http://www.the-scientist.com/?articles.view/articleNo/37121/title/Gamers-to-Fight-Tree-Ailment/</a>     | 21/08/2013 |
|                | BBC                                    | <a href="http://www.bbc.co.uk/news/science-environment-24134879">http://www.bbc.co.uk/news/science-environment-24134879</a>                                                                                       | 23/09/2013 |
|                | TIGA Awards day                        | <a href="http://awards13.tiga.org/awards_ceremony.php">http://awards13.tiga.org/awards_ceremony.php</a>                                                                                                           | 06/11/2013 |
|                | BBC countryfile                        | <a href="http://www.bbc.co.uk/programmes/b03j4y40">http://www.bbc.co.uk/programmes/b03j4y40</a>                                                                                                                   | 10/11/2013 |
|                | The Guardian                           | <a href="http://www.theguardian.com/technology/2014/jan/25/online-gamers-solving-sciences-biggest-problems">http://www.theguardian.com/technology/2014/jan/25/online-gamers-solving-sciences-biggest-problems</a> | 25/01/2014 |
|                | TSL/JIC                                | <a href="http://news.jic.ac.uk/2013/08/gamers-to-join-ash-dieback-fight-back/">http://news.jic.ac.uk/2013/08/gamers-to-join-ash-dieback-fight-back/</a>                                                           | 12/08/2013 |
|                | TSL/JIC                                | <a href="http://news.jic.ac.uk/2013/08/fraxinus-fever/">http://news.jic.ac.uk/2013/08/fraxinus-fever/</a>                                                                                                         | 30/08/2013 |
|                | Twitter (games for change competition) | <a href="https://twitter.com/TheSainsburyLab/status/391161357036711937">https://twitter.com/TheSainsburyLab/status/391161357036711937</a>                                                                         | 18/10/2013 |
|                | Facebook (BBC countryfile)             | <a href="https://www.facebook.com/photo.php?fbid=1448568202036769">https://www.facebook.com/photo.php?fbid=1448568202036769</a>                                                                                   | 08/11/2013 |
| Social network | Facebook (Game Update)                 | <a href="https://www.facebook.com/fraxinusgame/posts/1488147001412222">https://www.facebook.com/fraxinusgame/posts/1488147001412222</a>                                                                           | 06/02/2014 |

**Table S4.** Details about most active players contributing to Fraxinus

| UserID | Days Since Joining | Play Days | Inactive Days | Activity Ratio |
|--------|--------------------|-----------|---------------|----------------|
| 12269  | 350                | 332       | 18            | 18.44          |
| 7650   | 355                | 318       | 37            | 8.59           |
| 20536  | 330                | 279       | 51            | 5.47           |
| 8970   | 354                | 282       | 72            | 3.92           |
| 1315   | 343                | 271       | 72            | 3.76           |
| 8907   | 115                | 80        | 35            | 2.29           |
| 3792   | 356                | 247       | 109           | 2.27           |
| 14244  | 349                | 222       | 127           | 1.75           |
| 737    | 355                | 206       | 149           | 1.38           |
| 638    | 356                | 196       | 160           | 1.23           |
| 5315   | 348                | 164       | 184           | 0.89           |
| 12785  | 350                | 163       | 187           | 0.87           |
| 9176   | 355                | 158       | 197           | 0.80           |
| 12295  | 350                | 139       | 211           | 0.66           |
| 859    | 325                | 117       | 208           | 0.56           |
| 25113  | 145                | 52        | 93            | 0.56           |
| 6166   | 357                | 127       | 230           | 0.55           |
| 761    | 353                | 123       | 230           | 0.54           |
| 16183  | 347                | 120       | 227           | 0.53           |

**Table S5.** List of players agreed to be included as authors under "Fraxinus Players"

| Player Name <sup>†</sup>     | Score |
|------------------------------|-------|
| Colin Higgs                  | 11146 |
| Gonçalo José Martins Cabrita | 5502  |
| Lucy Lewis                   | 3962  |
| Jayne Shardlow               | 2867  |
| Sue Bell                     | 1840  |
| Lenka Habetinova             | 304   |
| Natalia Martinkova           | 77    |
| Terri Grassby                | 35    |
| Kate Ure                     | 24    |
| Robert Waterman              | 7     |
| Amanda Riley                 | 1     |
| Miranda Stoneham             | 1     |
| Eileen Thomas                | 1     |

<sup>†</sup> Fraxinus privacy policy is available at <https://oadbproject.tsl.ac.uk/terms.html>.
